# Supplementary material for: Biological Potential and Bioaccessibility of Encapsulated Curcumin into Cetyltrimethylammonium Bromide Modified Cellulose Nanocrystals
Source: MDPI journal article supplement (doi:10.3390/ph16121737), 2023-12-17
Supplement: s1 [file s1]

# Biological Potential and Bioaccessibility of Encapsulated Curcumin into CTAB Modified Cellulose Nanocrystals

Francisca Casanova \*, Carla F. Pereira, Alessandra B. Ribeiro, Pedro Castro, Ricardo Freixo, Eva Martins, Diana Valente, João Fernandes, Manuela E. Pintado and Óscar L. Ramos \*

CBQF—Centro de Biotecnologia e Química Fina-Laboratório Associado, Escola Superior de Biotecnologia, Universidade Católica Portuguesa, Rua Diogo Botelho 1327, 4169-005 Porto, Portugal

\* Correspondence: fcbastos@ucp.pt (F.C.); oramos@ucp.pt (Ó.L.R.)

## Supplementary Information

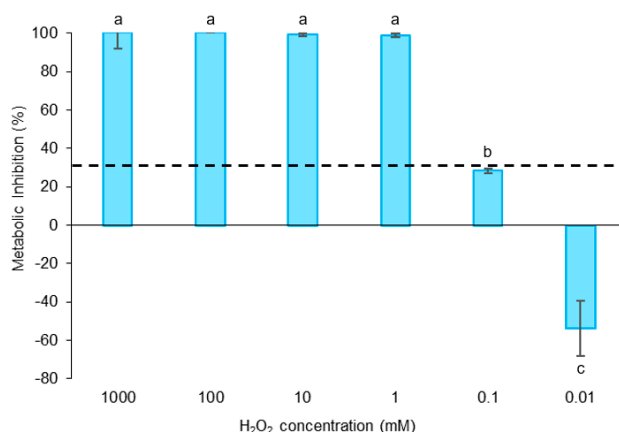

**Figure S1.** Impact of H<sub>2</sub>O<sub>2</sub> at various concentrations (10  $\mu$ M -1 M) upon Caco-2 cells metabolic activity. The dotted line represents the 30% cytotoxicity limit as defined by the ISO 10993-5:2. Different letters represent the statistically significant ( $p < 0.05$ ) differences found between samples.

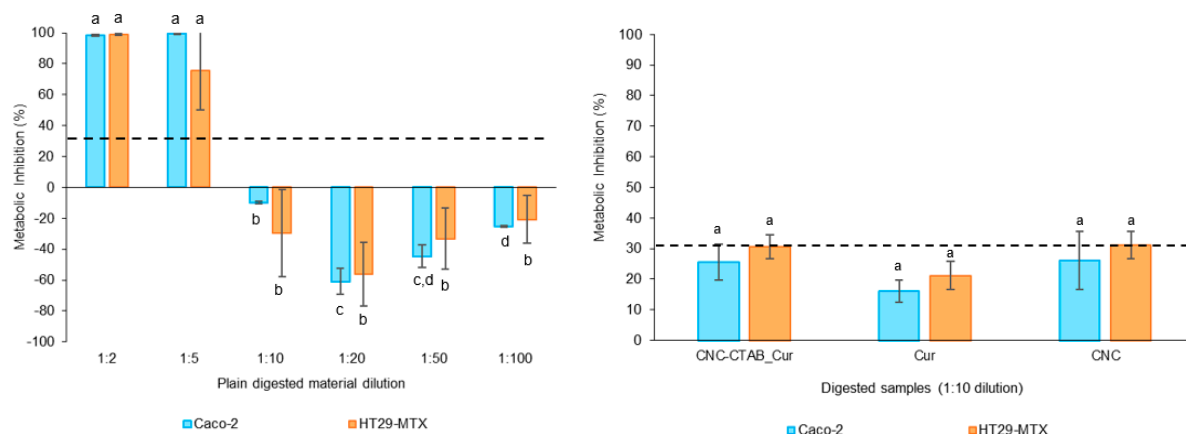

**Figure S2.** Impact of various dilutions of the digested CNC-CTAB system encapsulating curcumin, free curcumin and free CNC-CTAB upon Caco-2 and HT29-MTX cells metabolic activity. The dotted line represents the 30% cytotoxicity limit as defined by the ISO 10993-5:2. Different letters represent the statistically significant ( $p < 0.05$ ) differences found between the samples tested for each cell line assayed.
